# Supplementary material for: A Novel Neighborhood-Based Computational Model for Potential MiRNA-Disease Association Prediction
Source: Comput Math Methods Med. 2019 Jan 17;2019:5145646. doi: 10.1155/2019/5145646 (PMC6360053; doi:10.1155/2019/5145646)
Supplement: Supplementary Materials — Experimentally verified microRNA-disease associations. Each line represents an association between a microRNA and a disease. [file 5145646.f1.zip]

Archive with 5 entries (5 files):
- dataset1.xlsx
- disease.xlsx
- mfs.xlsx
- miRNA.xlsx
- README.txt
