# Supplementary material for: A Novel Neighborhood-Based Computational Model for Potential MiRNA-Disease Association Prediction
Source: Comput Math Methods Med. 2019 Jan 17;2019:5145646. doi: 10.1155/2019/5145646 (PMC6360053; doi:10.1155/2019/5145646)
Supplement: Supplementary Materials — Experimentally verified microRNA-disease associations. Each line represents an association between a microRNA and a disease. [file 5145646.f1.zip › README.txt]

=======================================================================================================
Welcome to use NBMDA algorithm. NBMDA is A Novel Neighborhood-based Computational Model for Potential MiRNA-Disease Association Prediction. This README.txt is used to give a brief introduce for the data profiles included in this directory. 
-------------------------------------------------------------------------------------------------------
###		Author:Yang Liu, Xueyong Li, Xiang Feng, Lei Wang
=======================================================================================================
miRNA.xlsx: the name list of the investigated miRNAs
disease.xlsx: the name list of the investigated diseases
mfs.xlsx: miRNA functional similarity
dataset1.xlsx: the known miRNA-disease associations 
